# Supplementary material
Source: PubMed Central journal article supplement (PMC4636435)
Supplement: NIHMS725079-supplement-1.pdf [file NIHMS725079-supplement-1.pdf]

# Cell Press Conflict of Interest Form

If submitting materials via Editorial Manager, please complete this form electronically and upload the file with your final submission.

Otherwise, please return the form as an email attachment to the copyeditor handling your manuscript.

---

Cell Press requires all authors to disclose any financial interest that might be construed to influence the results or interpretation of their manuscript.

As a guideline, any affiliation associated with a payment or financial benefit exceeding \$10,000 p.a. or 5% ownership of a company or research funding by a company with related interests would constitute a financial interest that must be declared. This policy applies to all submitted research manuscripts and review material.

Examples of statement language include: AUTHOR is an employee and shareholder of COMPANY; AUTHOR is a founder of COMPANY and a member of its scientific advisory board. This work was supported in part by a grant from COMPANY.

Please disclose any such interest below on behalf of all authors of this manuscript.

---

## Please check one of the following:

- None of the authors of this manuscript have a financial interest related to this work.
- Please print the following disclosure statement in the Acknowledgments section:

## Please provide the following information:

Please check this box to indicate that you have asked every author of this work to declare any conflicts of interest. Your answers on this form are on behalf of every author of this work.

Manuscript #: CELL-HOST-MICROBE-D-15-00321R2

Title: Group A Streptococcal M1 Protein Sequesters Cathelicidin to Evade Innate Immune Killing

Author list: Christopher N. LaRock, Simon Döhrmann, Jordan Todd, Ross Corriden, Joshua Olson, Timo Johannssen, Bernd Lepenies, Richard L. Gallo, Partho Ghosh, Victor Nizet

Your name: Victor Nizet, MD

Date: August 29, 2015

Cell Press, 600 Technology Square, 5th floor, Cambridge, MA 02139, USA
